# Supplementary material for: Heparin-based temperature-sensitive injectable hydrogels for protein delivery
Source: Royal Society of Chemistry journal article supplement (doi:10.1039/c5tb01399b), 2015-01-01
Supplement: c5tb01399b1.pdf [file c5tb01399b1.pdf]

(Electronic Supplementary Information for *Journal of Materials Chemistry B*)

## **Heparin-based temperature-sensitive injectable hydrogels for protein delivery**

Hye Jin Sim, Thavasyappan Thambi, and Doo Sung Lee\*

School of Chemical Engineering, Theranostic Macromolecules Research Center,  
Sungkyunkwan University, Suwon, Republic of Korea

\*Corresponding author:

Doo Sung Lee, Ph.D.

Tel.: +82-31-290-7282; Fax: 82-31-292-8790; e-mail: [dslee@skku.edu](mailto:dslee@skku.edu)

**Table S1.** Physicochemical characteristics of PCLA copolymers.

| Entry | PEG  | Feed ratio          |       | Obtained ratio <sup>a</sup> |       | Note <sup>b</sup>     |
|-------|------|---------------------|-------|-----------------------------|-------|-----------------------|
|       |      | Copolymer structure | CL/LA | Copolymer structure         | CL/LA |                       |
| 1     | 1620 | 2000-1620-2000      | 2.5   | 1728-1620-1728              | 3.1   | Good gel <sup>c</sup> |
| 2     | 1620 | 2500-1620-2500      | 2.5   | 2216-1620-2216              | 3.1   | Hydrophobic           |
| 3     | 1750 | 2000-1750-2000      | 2.5   | 1975-1750-1975              | 3.2   | Good gel              |
| 4     | 1750 | 2500-1750-2500      | 2.5   | 2275-1750-2275              | 2.8   | Hydrophobic           |
| 5     | 1750 | 2500-1750-2500      | 3     | 2326-1750-2326              | 3     | Hydrophobic           |
| 6     | 2050 | 2000-2050-2000      | 2.5   | 1835-2050-1835              | 2.2   | Rapid degradation     |
| 7     | 2050 | 1835-2050-1835      | 2.5   | 2358-2050-2358              | 2.3   | Hydrophobic           |
| 8     | 2050 | 3000-2050-3000      | 2.5   | 2764-2050-2764              | 3.1   | Good gel              |
| 9     | 2050 | 3000-2050-3000      | 3     | 2685-2050-2685              | 3.6   | Hydrophobic           |
| 10    | 3350 | 3850-3350-3850      | 2.5   | 3514-3350-3513              | 2.8   | Good gel              |
| 11    | 3350 | 4000-3350-4000      | 2.5   | 3543-3350-3543              | 3.6   | Cannot form gel       |
| 12    | 4000 | 5300-4600-5300      | 2.5   | 5107-4600-5107              | 2.7   | Cannot form gel       |

<sup>a</sup>Number-average molecular weight calculated using <sup>1</sup>H NMR.

<sup>b</sup>Sol-gel properties of PCLA copolymers observed at 37 °C.

<sup>c</sup>For chemical conjugation, entry no.1 was used.

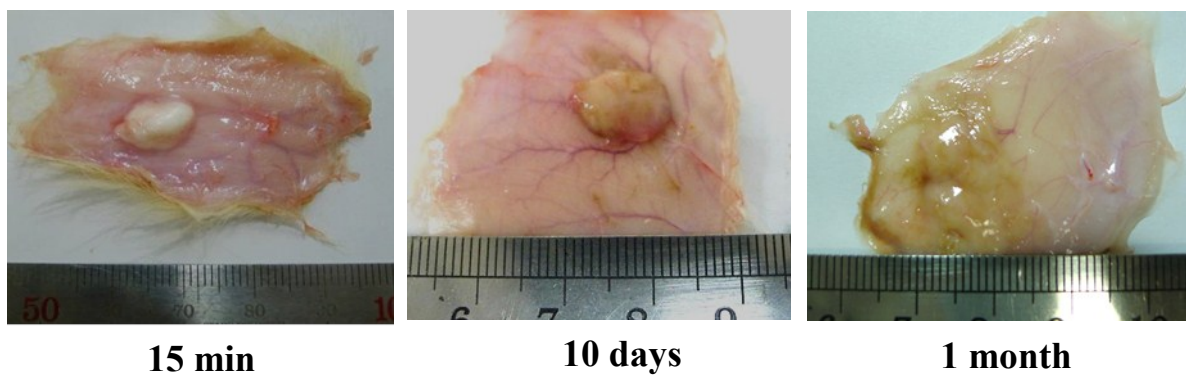

**Fig. S1.** *In vivo* gelation and stability of PCLA+Hep-PCLA2 mixture hydrogel (27.5 wt%).
